# Supplementary material
Source: PubMed Central journal article supplement (PMC6983444)
Supplement: pnas.1914380117.sapp.pdf [file pnas.1914380117.sapp.pdf]

# PNAS

[www.pnas.org](http://www.pnas.org)

Supplementary Information for

Retroconversion of estrogens into androgens by bacteria via a cobalamin-mediated methylation

Po-Hsiang Wang, Yi-Lung Chen, Sean Ting-Shyang Wei, Kan Wu, Tzong-Huei Lee, Tien-Yu Wu, and Yin-Ru Chiang

Correspondence to Yin-Ru Chiang  
Email: [yinru915@gate.sinica.edu.tw](mailto:yinru915@gate.sinica.edu.tw)

**This PDF file includes:**

Supplemental Materials and Methods  
Figures S1 to S11  
Tables S1 to S6  
Legends for Datasets S1 to S2  
Appendix S1 to S5  
SI References

**Other supplementary materials for this manuscript include the following:**

Datasets S1 to S2

## Supplemental Materials and Methods

### Chemicals and Bacterial Strains

[3,4C-<sup>13</sup>C]estrone (99%) was purchased from Cambridge Isotope Laboratories (Tewksbury, USA). [16,16,17-D3]17 $\beta$ -estradiol (98 %), 5 $\alpha$ -androstane-17 $\beta$ -ol-3-one (=17 $\beta$ -hydroxyandrostane-3-one) and 3 $\alpha$ -H-4 $\alpha$ (3'-propanoate)-7 $\alpha$  $\beta$ -methylhexahydro-1,5-indanedione (HIP) were obtained from Sigma-Aldrich (St. Louis, MO, USA). 5 $\alpha$ -androstane-3 $\beta$ ,17 $\beta$ -diol (=3 $\beta$ ,17 $\beta$ -dihydroxyandrostane) was purchased from Steraloids Inc (Newport, RI, USA). Other chemicals were analytical grade and purchased from Mallinckrodt Baker (Phillipsburg, USA), Merck Millipore (Burlington, USA), and Sigma-Aldrich unless specified otherwise. *Denitratisoma oestradiolicum* strain AcBE2-1 (=DSM 16959) and *Steroidobacter denitrificans* strain FS (=DSM 18526) were purchased from the Deutsche Sammlung für Mikroorganismen und Zellkulturen (DSMZ; Braunschweig, Germany).

### Enrichment of *Denitratisoma* sp. strain DHT3 from an anoxic sludge

Strain DHT3 was enriched from an anoxic sludge collected from the Dihua Sewage Treatment Plant, Taipei, Taiwan (DHSTP; 25°4'20.97"N, 121°30'36.17"E). To enrich the anaerobic estrogen utilizer, the sludge sample (100 mL) was spiked with estradiol (1 mM) and nitrate (10 mM), and was incubated at 28°C under a N<sub>2</sub>/CO<sub>2</sub> (80:20, v/v) atmosphere in the dark (to avoid growth of phototroph) for 14 days. Later, twenty milliliters of the estradiol-spiked sludge sample was transferred to a chemically defined mineral medium (500 mL) (1) with estradiol (1 mM) as the sole substrate and nitrate as the terminal electron acceptor. The final pH was adjusted to 6.5 with HCl to alleviate the gradual pH increase in culture caused by denitrification. After the added estradiol was mostly consumed, the estradiol-spiked mixed culture (1 mL) was transferred to the same defined medium (200 mL). This step was repeated ten times to selectively enrich the anaerobic estrogen utilizer. The 10<sup>th</sup> transfer culture was serially diluted from 10<sup>1</sup> to 10<sup>9</sup> times in the same defined medium to eliminate the non-estrogen degraders, and incubated under the same conditions. After the 10<sup>9</sup> times-diluted culture consumed most of the added estradiol, the dilution-to-elimination transfers were repeated again. After that, the culture purity was validated microscopically and by growth tests of the enrichment culture in liquid R2A rich medium and in the defined medium added with yeast extracts. The 16S rRNA gene sequence was amplified from the total genomic DNA extracted from the enrichment culture using universal primers 27F and 1492R (2), and the taxonomy of strain DHT3 was determined using BLAST. Since the growth of strain DHT3 in the solid medium (agar or gelrite plate) was not observed, we do not exclude the possibility that trace contaminated microbes are present in the microscopically pure strain DHT3 enrichment culture.

### Anaerobic growth of strain DHT3 with and without vitamins

To test the vitamin requirements of strain DHT3, we anaerobically cultivated strain DHT3 in the defined mineral media containing estradiol (3 mM), nitrate (initially 10 mM), and individual vitamins [cyanocobalamin (20  $\mu$ g/L), biotin (10  $\mu$ g/L), calcium pantothenate (25  $\mu$ g/L), thiamine (50  $\mu$ g/L), *p*-aminobenzoic acid (50  $\mu$ g/L), nicotinic

acid (100 µg/L), or pyridoxamine (250 µg/L)]. The growth of strain DHT3 with and without the mixed vitamin solution VL-7 (3) was served as the positive and negative controls, respectively. The cultures were sampled daily, and the samples (0.5 mL each) were centrifuged at  $10,000 \times g$  for 10 min at 4°C. After centrifugation, the bacterial pellets were stored at -20°C before protein content determination. Proteins were extracted from the frozen pellets using B-PER Bacterial Cell Lysis Reagents (Thermo Fisher Scientific; Waltham, MA, USA). The protein content in the samples was estimated using Pierce BCA Protein Assay Kit (Thermo Fisher Scientific) according to manufacturer's instructions, with a standard curve generated using analytical-grade bovine serum albumin. The nitrate content was measured using Spectroquant Nitrate Test Kit HC707906 (Merck, Germany) according to manufacturer's instructions.

## **Analytical methods**

### **(a) Thin-layer Chromatography (TLC)**

The steroid standards and products were separated on silica gel-coated aluminum TLC plates (Silica gel 60 F<sub>254</sub>; thickness, 0.2 mm; 20 × 20 cm; Merck) using dichloromethane:ethyl acetate:ethanol (14:4:0.05, v/v/v) as the developing phase. The steroids were visualized under UV light at 254 nm or by spraying the TLC plates with 30% (v/v) H<sub>2</sub>SO<sub>4</sub>, followed by an incubation for 1 min at 100°C (in an oven).

### **(b) High-Performance Liquid Chromatography (HPLC)**

A reversed-phase Hitachi HPLC system equipped with an analytical RP-C<sub>18</sub> column (Luna 18(2), 5 µm, 150 × 4.6 mm; Phenomenex) was used for separating steroidal metabolites in this study. The separation was achieved isocratically using a mobile phase of 45% methanol (v/v) at 35°C at a flow rate of 0.5 mL/min. The steroidal metabolites were detected using a photodiode array detector (200–450 nm). In some studies, HPLC was also used for quantifying steroids present in the strain DHT3 cultures. The quantity of steroids was measured using a standard curve generated from individual commercial steroid standards. The *R*<sup>2</sup> values for the standard curves were at least > 0.98. The presented data are the average values of three experimental measurements.

### **(c) Ultra-Performance Liquid Chromatography–High Resolution Mass Spectrometry (UPLC–HRMS)**

Steroids were analyzed using UPLC–HRMS on a UPLC system coupled to either an Electric Spray Ionization–Mass Spectrometry (ESI–MS) system or an Atmosphere Pressure Chemical Ionization–Mass Spectrometry (APCI–MS) system. Steroids were firstly separated using a reversed-phase C<sub>18</sub> column (Acquity UPLC<sup>®</sup> BEH C18; 1.7 µm; 100 × 2.1 mm; Waters) at a flow rate of 0.4 mL/min at 35°C (oven temperature). The mobile phase comprised a mixture of two solutions: solution A (0.1% formic acid (v/v) in 2% acetonitrile (v/v)) and solution B (0.1% formic acid (v/v) in methanol). Separation was achieved using a gradient of solvent B from 10% to 99% in 8 min. ESI–MS analysis was performed using a Thermo Fisher Scientific<sup>™</sup> Orbitrap Elite<sup>™</sup> Hybrid Ion Trap–Orbitrap Mass Spectrometer (Waltham, MA, USA). Mass spectrometric data in positive ionization mode were collected. The source voltage was set at 3.2 kV; the capillary and source heater temperatures were 360°C and 350°C, respectively; the sheath, auxiliary, and sweep gas flow rates were 30, 15 and 2 arb units, respectively. APCI–MS analysis

was performed using a Thermo Fisher Scientific™ Orbitrap Elite™ Hybrid Ion Trap-Orbitrap Mass Spectrometer (Waltham, MA, USA) equipped with a standard APCI source. Mass spectrometric data in positive ionization mode (parent scan range: 50–600  $m/z$ ) were collected. The capillary and APCI vaporizer temperatures were 120°C and 400°C, respectively; the sheath, auxiliary, and sweep gas flow rates were 40, 5 and 2 arbitrary units, respectively. The source voltage was 6 kV and current 15  $\mu$ A. The elemental composition of individual adduct ions was predicted using Xcalibur™ Software (Thermo Fisher Scientific).

#### **(d) Nuclear Magnetic Resonance (NMR) spectroscopy**

<sup>1</sup>H- and <sup>13</sup>C-NMR spectra were recorded at 27°C using a Bruker AV600\_GRC 600MHz NMR. Chemical shifts ( $\delta$ ) were recorded and presented in parts per million with deuterated methanol (99.8%) as the solvent and internal reference.

#### **General molecular biological methods**

The strain DHT3 genomic DNA was extracted using the Presto™ Mini gDNA Bacteria Kit (Geneaid, Taiwan). PCR mixtures (50  $\mu$ L) contained nuclease-free H<sub>2</sub>O, 2  $\times$  PCR buffer (25  $\mu$ L), dNTPs (2 mM), *Taq* polymerase (1.2 U) (BioTherm; NatuTec GmbH; Frankfurt am Main, Germany), forward and reverse primers (each 200 nM), and template DNA (30 ng). The PCR products were verified using standard TAE-agarose gel (1.5%) electrophoresis with the SYBR® Green I nucleic acid gel stain (Thermo Fisher Scientific), and the PCR products were purified using the GenepHlow Gel/PCR Kit (Geneaid).

#### **RNA isolation and bridging PCR**

Bridging PCR was applied to determine the polycistronism of the *emt* gene cluster. Total RNA was extracted from the estradiol-grown strain DHT3 cells using the Direct-zol RNA MiniPrep Kit (Zymo Research; Tustin, CA, USA). The crude total RNA was further purified using Turbo DNA-free Kit (Thermo Fisher Scientific) to eliminate DNA. The DNA-free total RNA was reversely transcribed to cDNA using the SuperScript® IV First-Strand Synthesis System (Thermo Fisher Scientific). Random hexamer primers were used for cDNA synthesis. The polycistronism of the *emt* gene cluster was analyzed using intergenic PCR with total cDNA as the template and the following PCR program was used: 95°C for 5 min, followed by 25 cycles at 95°C for 30 s, 60°C for 30 s, 72°C for 75 s, and finally 72°C for 3 min. The primers are shown in **Table S2**. The strain DHT3 genomic DNA and total RNA were used as the positive and negative control, respectively.

#### **RNA extraction and RNA-Seq**

The strain DHT3 transcriptome was extracted from the strain DHT3 cells anaerobically cultivated with estradiol (2 mM) or testosterone (2 mM) as the sole substrate. The transcriptomes were extracted using the Direct-zol RNA MiniPrep Kit (Zymo Research), and were further purified using Turbo DNA-free Kit (Thermo Fisher Scientific) to eliminate DNA. rRNA was removed from the transcriptome samples using the Ribo-Zero rRNA Removal Kit (Epicentre Biotechnologies; Madison, WI, USA). The quality of the resulting RNA library was assessed using the Experion RNA Analysis Kit (Bio-Rad; Hercules, CA, USA), and only the samples with an integrity number 8-10 were

selected for transcriptomic analysis. First-strand cDNA was synthesized using the purified transcriptomes as the templates. Second-strand cDNA was synthesized in a reaction mixture containing Second-Strand Synthesis Kit (New England Biolabs; Ipswich, MA, USA). cDNA was purified using the Qiagen purification kit, followed by end repair using NEBNext® End Repair Module (New England Biolabs). Antisense strand DNA was digested in the samples using the Uracil-Specific Excision Reagent Enzyme Kit (New England Biolabs), followed by a PCR to amplify the cDNA. The constructed sequencing libraries were sequenced as paired-end reads (with 126-bp read length) on the Illumina HiSeq 2000 system (Illumina; San Diego, CA). Adapter of the RNA-Seq reads were removed with cutadapt (Version 1.4.2) and the remaining sequences were trimmed by using Seqtk (Version 1.2-r94). The maximum ambiguous nucleotide number was set to 2; the lasting sequences (min length = 35-bp; error probability < 0.05) were included for subsequent analysis. The constructed sequencing libraries were mapped to the coding DNA sequences in the strain DHT3 genome using Bowtie2 (Version 2.2.3). The mapping results were quantified using eXpress (Version 1.5.1) with software's default setting and expressed in terms of Reads Per Kilobase of transcript per Million mapped reads (RPKM).

### ***emtA* gene disruption in strain DHT3**

The *emtA* gene of strain DHT3 was disrupted by an intragenic insertion of a group II intron into this gene using the TargeTron Gene Knockout System Kit (Sigma-Aldrich, St. Louis, MO). The intron insertion sites for *emtA* were predicted using online intron design software (TargeTron gene knockout system; Sigma-Aldrich), and the primer sequences were generated for intron retargeting. The intron PCR template from the TargeTron Gene Knockout System Kit and the following four primers were used for the construction: *emtA*-773|774 -IBS, *emtA*-773|774s -EBS1d, *emtA*-773|774s -EBS2, and EBS universal primer (see **Table S2** for individual sequences). The PCR was performed according to the manufacturer's instructions. The 350-bp PCR product was purified and subsequently ligated into the pACD4K-C Linear Vector. This resulted in a plasmid, pACD4K-C::*emtA*, specific for *emtA* knockout by insertion of the intron fragment between the 773th and 774th base pairs in the sense direction. The construct mixture was firstly transformed into the ECOS™ 101 *E. coli* strain DH5 $\alpha$  competent cells via heat-shock incubation (Yeastern Biotech, Taipei, Taiwan). The pACD4K-C::*emtA* purified from the correct clones (sequences verified using Sanger Sequencing) was then transformed to strain DHT3 through electroporation (2,500 V, 25  $\mu$ F, and 200  $\Omega$ ). Strain DHT3 does not carry a copy of T7 RNA Polymerase on the chromosome. Therefore, a source of T7 RNA Polymerase was provided by co-transforming another plasmid pAR1219 (Sigma-Aldrich, St. Louis, MO). The plasmids pACD4K-C::*emtA* and pAR1219 were maintained by selection on chloramphenicol and ampicillin, respectively. Strain DHT3 containing the two plasmids was anaerobically incubated in a chemically defined medium containing estradiol (2 mM), chloramphenicol (100  $\mu$ g/mL) and ampicillin (100  $\mu$ g/mL). The bacterial culture was cultivated at 28°C under a N<sub>2</sub>/CO<sub>2</sub> atmosphere (80:20, v/v). When the cultures reached a cell density of  $\sim 8 \times 10^8$ /mL, isopropyl  $\beta$ -D-1-thiogalactopyranoside (IPTG) (2 mM) was added to the bacterial culture. After overnight incubation, the strain DHT3 cells were harvested through a centrifugation at 3,500  $\times$  g for 10 min at 20°C. The *emtA*-disruption was then selected using a kanamycin marker that was activated upon

chromosomal insertion. Therefore, the resulting strain DHT3 cell pellet was resuspended and was cultivated in a chemically defined medium containing testosterone (2 mM) and kanamycin (20 µg/mL). Kanamycin-resistant strain DHT3 cells were then isolated by two subsequent serial dilution series (10<sup>1</sup> to 10<sup>9</sup> times) using the same medium. Successful *emtA* disruption was confirmed using PCR with primers flanking the *emtA* gene (see **Table S2** for individual sequences).

### **Analysis of the steroidal metabolite profile of the estrogen-grown strain DHT3**

Strain DHT3 cells in the exponential growth phase (with a cell density of approximately 8 × 10<sup>8</sup>/mL) were harvested through a centrifugation at 8,000 × g for 10 min at 25 °C. After decanting the supernatants, the cell pellets were immediately resuspended in the same chemically defined medium. The concentrated strain DHT3 suspensions (5 × 10<sup>9</sup>/mL; 10 mL) were spiked with 1 mM of estrone (unlabeled estrone and [3,4C-<sup>13</sup>C]estrone mixed in a 1:1 molar ratio) and was incubated under a N<sub>2</sub>/CO<sub>2</sub> (80:20, v/v) atmosphere at 28°C with continuous stirring. 17α-ethinylestradiol (final concentration 50 µM), which cannot be utilized by strain DHT3, was added to the concentrated strain DHT3 cell suspensions to serve as an internal control. The cell suspension samples (0.5 mL) were withdrawn every 30–120 min, and were extracted with equal volumes of ethyl acetate three times. The ethyl acetate fractions containing the estrone-derived metabolites were pooled, vacuum-dried, and analyzed using UPLC–HRMS.

### **Preparation of cell-extracts**

Frozen strain DHT3 cell pellets (5 g) were suspended in 15 mL of HEPES-K<sup>+</sup> buffer (pH 8.0; 100 mM). Strain DHT3 cells were broken by passing the cell suspensions through a French pressure cell (Thermo Fisher Scientific) twice at 137 megapascals. The cell lysates were fractionated using two steps of centrifugation steps. First, the cell-lysates were centrifuged at 20,000 × g for 30 min to get rid of most cell debris, unbroken cells and residual estradiol. Second, the supernatants containing the crude cell-extracts were centrifuged at 100,000 × g for 1.5 h to fractionate the soluble proteins from the membrane-bound proteins. All steps used for preparation of cell-extracts were performed at 4°C under anaerobic conditions.

### **Cell-extract estradiol methylation activity assays**

Assays were routinely performed in the dark (prevent abiotic cob(I)alamin oxidation) at 30°C for 1.5 h under an N<sub>2</sub> atmosphere. The assay mixtures (1 mL) contained HEPES-K<sup>+</sup> buffer (pH 8.0; 100 mM), soluble protein fraction (5 mg) extracted from strain DHT3 cells, estradiol (0.25 mM; [16,16,17-D3]estradiol and unlabeled estradiol in a 1:1 molar ratio), ATP (5 mM), MgSO<sub>4</sub> (10 mM), and methylcobalamin (1 mM). In some assays, Ti(III) citrate-reduced cob(I)alamin (1 mM), SAM (0.25 mM), NADH (2 mM), and propyl-iodide (2.5 mM) were added to the assay mixtures. After 1.5 hours of incubation, the assays were extracted twice with the same volume of ethyl acetate. The ethyl acetate fractions containing estradiol-derived compounds were pooled, vacuum-dried, and stored at -20°C before further analytical analysis.

### **Phylogenetic analysis**

**(a) cobalamin-dependent estradiol methyltransferase system EmtABCD**

The amino acid sequences of B9N43\_10325 (*emtA*) from strain DHT3, *emtA* orthologs CBW56\_16915 from *D. oestradiolicum* DSM 16959 and AMN47925.1 from *S. denitrificans* DSM 18526, and sequences of cobalamin-dependent methyltransferases searched with EmtA as query in UniProt (manually reviewed) were selected. The amino acid sequences of other cobalamin-dependent methyltransferases that have been functionally characterized (4) were also used for this phylogenetic analysis (**Table S4**). Fifty protein sequences were aligned using MUSCLE (5) in MEGA X (6) without truncation. The unrooted maximum likelihood tree was constructed using the LG model for amino acid substitution plus Gamma distribution rates (G) after the Model Test in MEGA X. The NNI for ML heuristic method and NJ/BioNJ for tree initiation were used for tree inference. Branch support was determined by bootstrapping 1,000 times. The maximum likelihood tree was then visualized in MEGA X.

**(b) 16S rRNA genes of selected steroid-degrading bacteria and their organization of genes involved in HIP catabolism**

The steroid-degrading bacteria with the corresponding sequenced genomes were chosen for this analysis. Protein sequences deduced from the previously characterized HIP degradation genes were used as queries to identify the orthologs in these genomes (**Dataset S2**). The deduced protein sequences from *Comamonas testosteroni* strain CNB-2 (a model organism for aerobic testosterone catabolism) and from *Mycobacterium tuberculosis* strain H37Rv (a model organism for aerobic cholesterol catabolism) were used as the queries for the BLASTP analysis. Ortholog identification in each selected genomes was based on the criteria (e-value < 1e-5; pairwise identify  $\geq$  40%; query coverage  $\geq$  80%) of the BLASTP results.

## Supplemental Figures

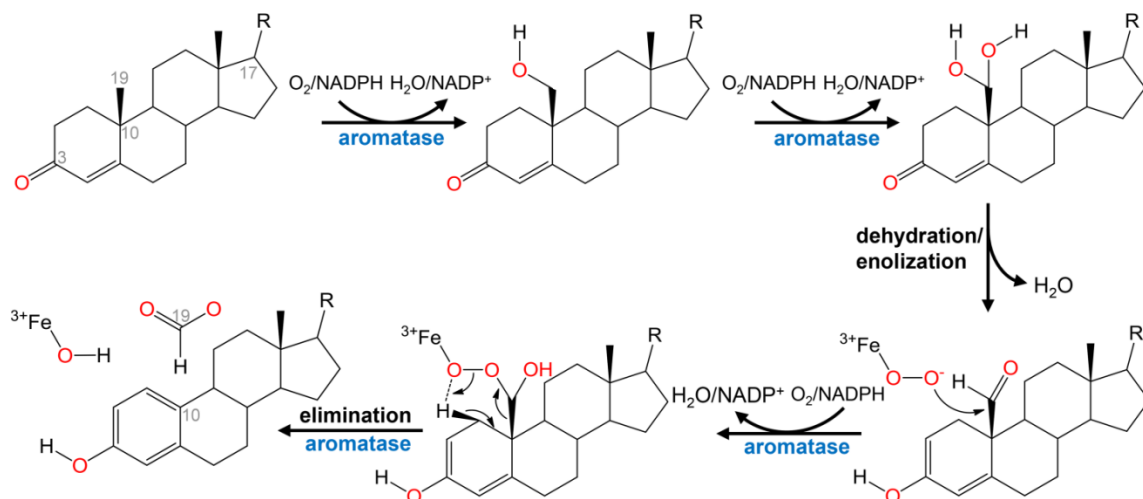

**Fig. S1.** Possible mechanisms involved in the aromatase-mediated conversion of C<sub>19</sub> androgens into C<sub>18</sub> estrogens.



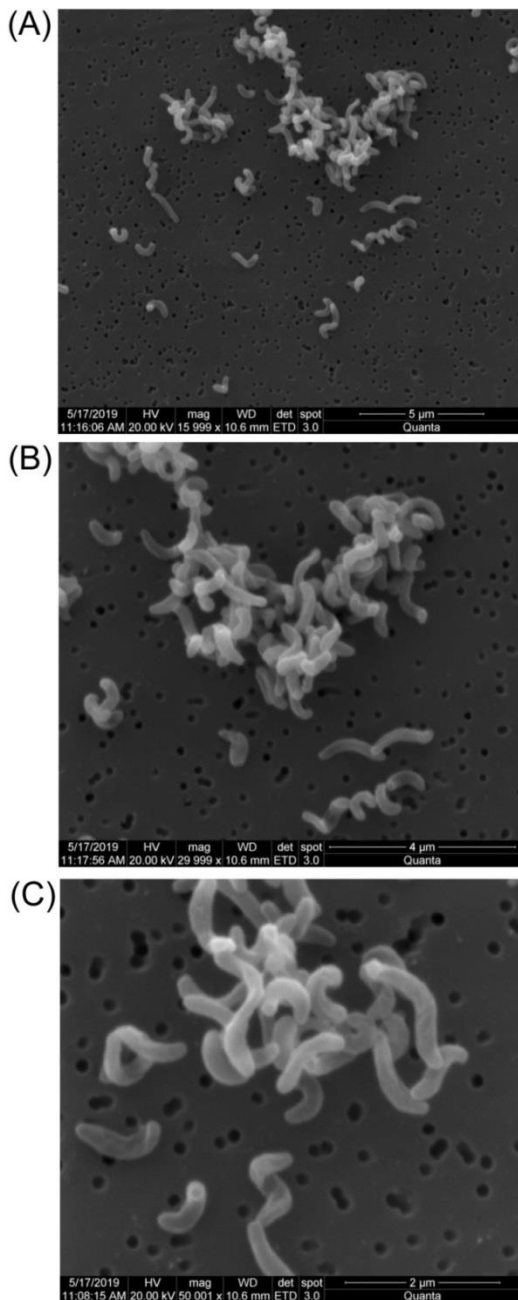

**Fig. S2.** Scanning electron micrographs of the strain DHT3 cells. The cells were fixed in 0.1 M sodium phosphate buffer (pH 7.0) containing 2.5 % (w/v) glutaraldehyde and 4 % (w/v) paraformaldehyde at room temperature for 1 hour. The sample was post-fixed in 1 % (w/v) OsO<sub>4</sub> in the same buffer at room temperature for 1 hour. The sample was then dehydrated using ethanol. Critical point drying was achieved using Hitachi HCP-2 critical point dryer. After coating using the Hitachi E-1010 ion sputter, a FEI Quanta 200 scanning electron microscope at 20 KV was used for viewing and imaging.

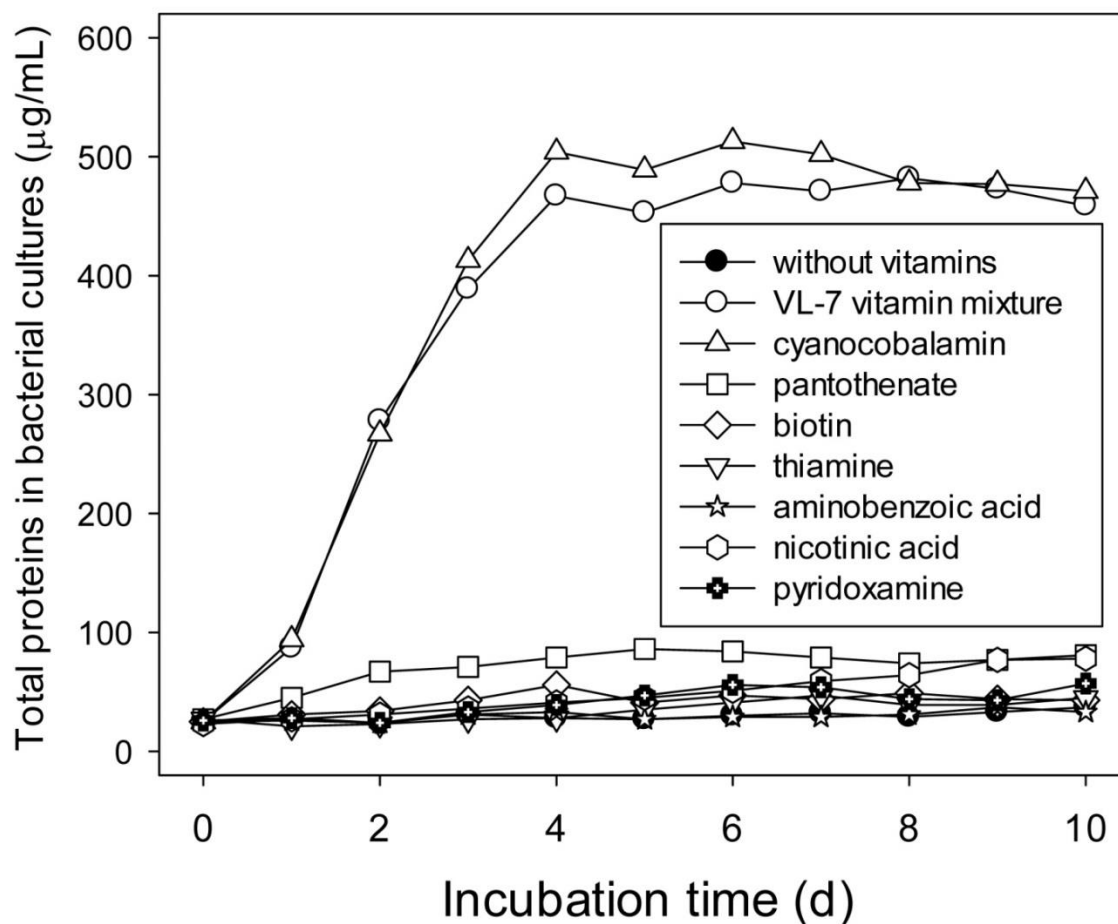

**Fig. S3.** Cobalamin as an essential vitamin during the anaerobic growth of strain DHT3 on estradiol. The fed-batch cultures (100 mL) of strain DHT3 were treated with or without vitamins. In all of the treatments, estradiol (3 mM) served as the sole carbon and energy source, whereas nitrate (initially 10 mM) served as terminal electron acceptor. Bacterial growth was measured as the total protein concentration in the cultures, and the data shown are averages (deviations <5%) of three experimental measurements.

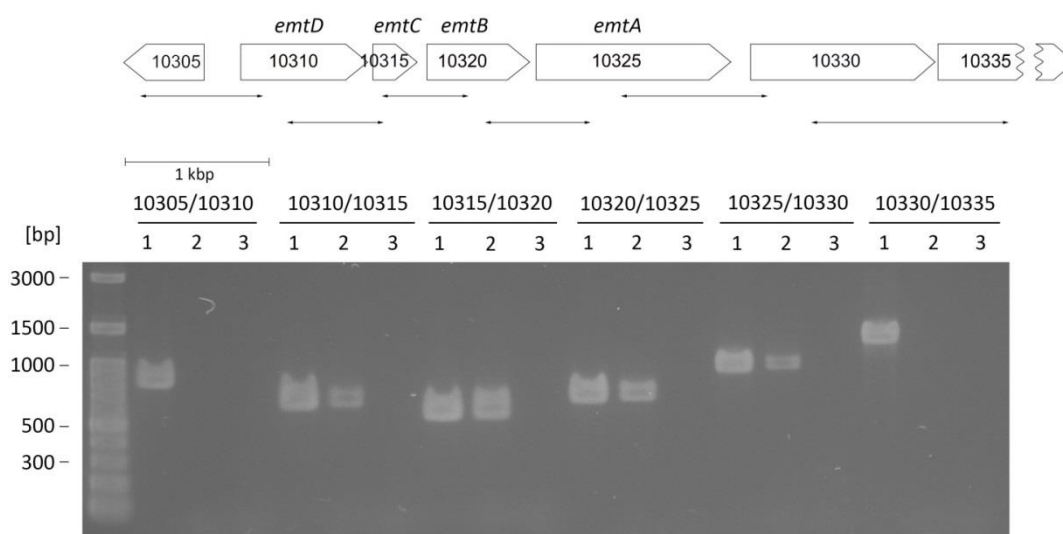

**Fig. S4.** Arrangement and expression analysis of the *emt* genes in strain DHT3. The *emt* operon of strain DHT3 comprises five genes (B9N43\_10310~10330). For operon analysis, total RNA from strain DHT3 was extracted and the contaminating DNA was removed. cDNA was synthesized by reverse transcriptase using random hexamers as primers. To analyze the transcriptional unit, cDNA was used as template for PCR to bridge the intergenic regions of the *emt* genes. Each primer set was applied to 3 different PCR templates, including genomic DNA (lane 1), cDNA synthesized using random hexamers (lane 2), and total RNA (lane 3). Genomic DNA and total RNA were used as positive and negative controls, respectively. Oligonucleotides used in this study are listed in **Table S1** and their location is indicated by black arrows.

(A)

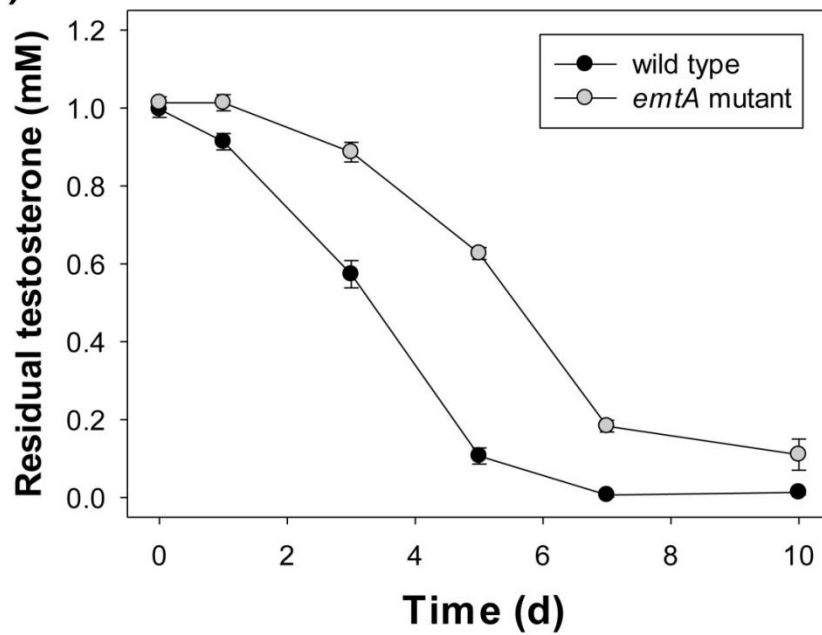

(B)

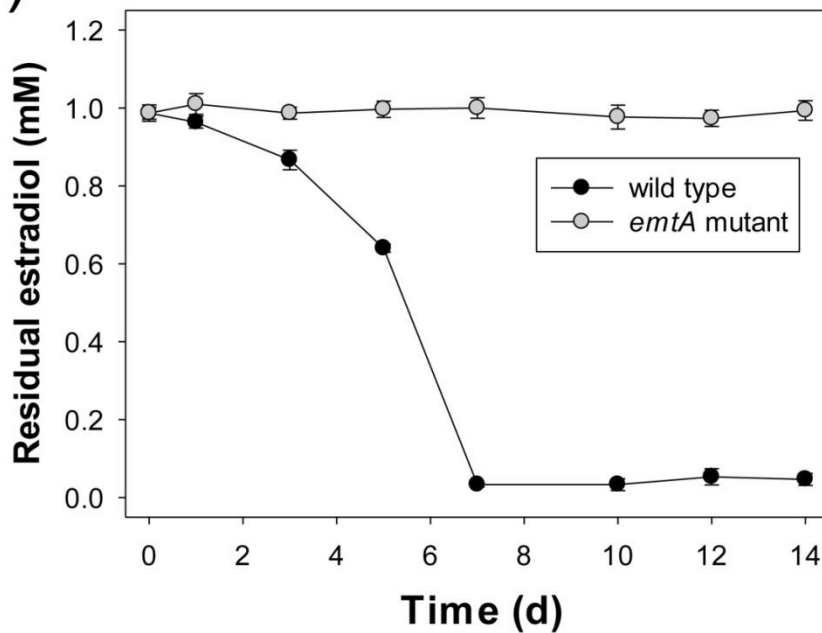

**Fig. S5.** The anaerobic growth of the wild type and the *emtA*-disrupted mutant of strain DHT3 with testosterone (A) and estradiol (B).

(A)

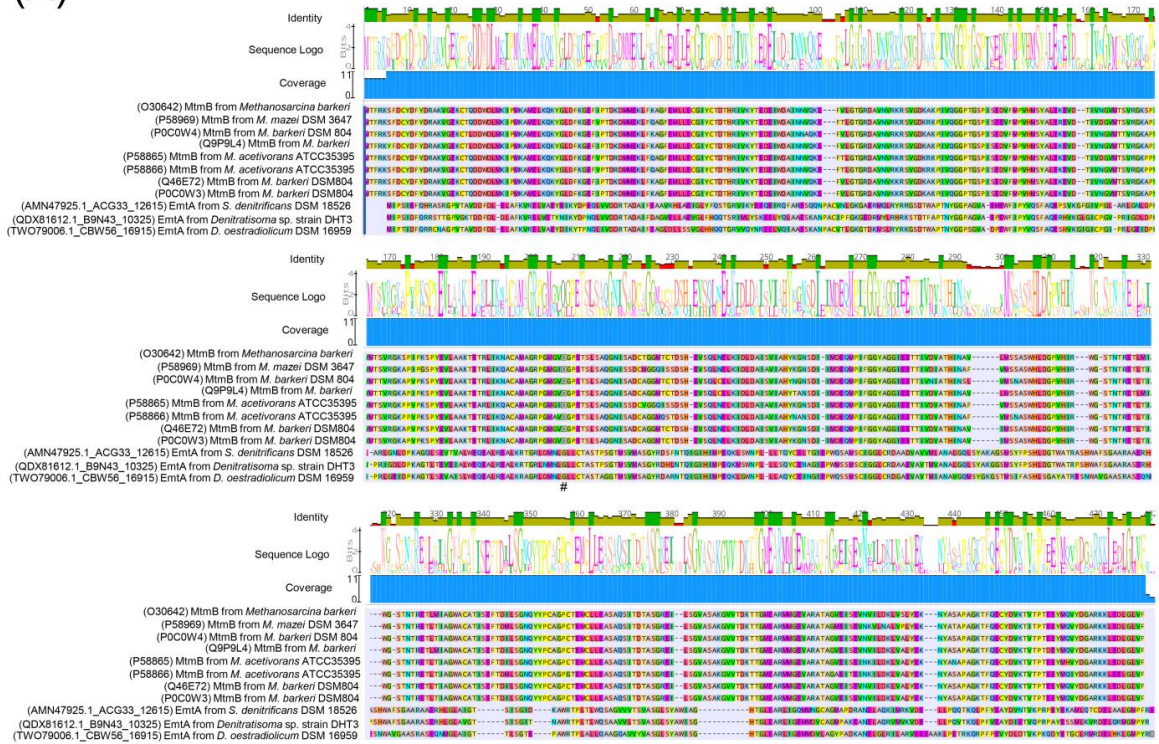

(B)

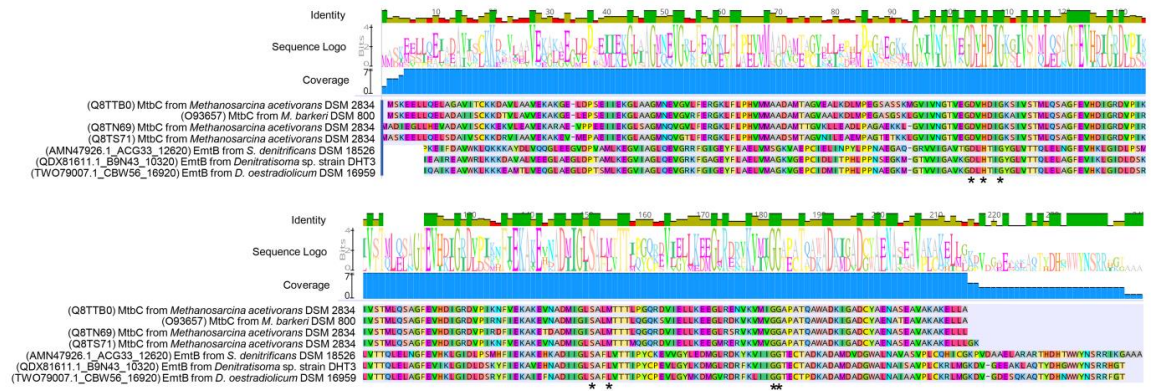

**Fig. S6.** Sequence alignments of EmtAB and their similar proteins via MUSCLE algorithm. (A) The sequence alignment of EmtA and MtmB. The pyrrolysine (1-letter abbreviation: O; marked with #) is identified in all the MtmB sequences but not in the EmtA sequences. These sequences are also used for the phylogenetic tree construction in **Fig. 4C**. (B) The sequence alignment of EmtB and MtbC. The MtbC sequences are obtained from Uniprot database using EmtB as a query. All MtbC used for this analysis are manually reviewed. The cobamide-binding motifs (D-x-H-x<sub>2</sub>-G-x<sub>41-42</sub>-S-x-L-x<sub>24-28</sub>-G-G; the conserved amino acid residues are marked with \*) are identified in all the MtbC and EmtB sequences.

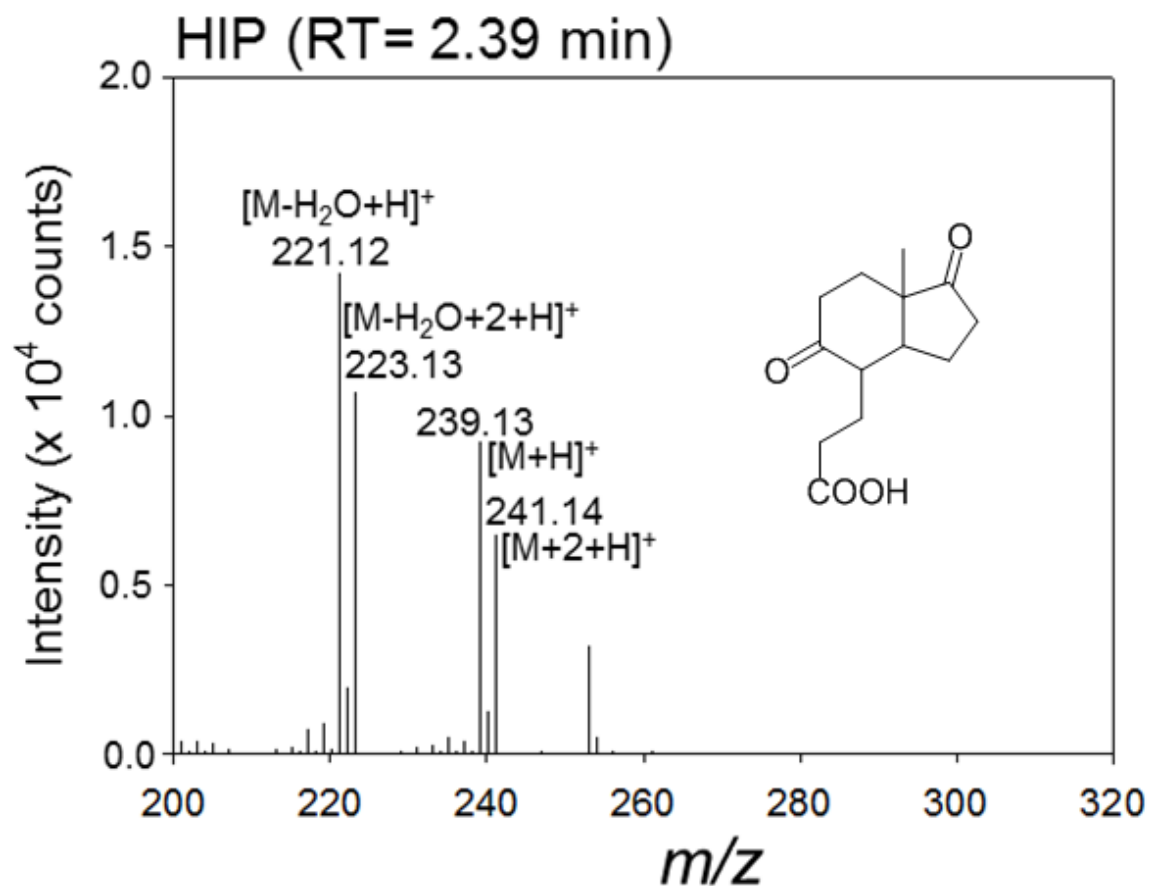

**Fig. S7.** APCI-HRMS spectrum of the HIP produced by the estrone-fed strain DHT3. The steroid substrate was composed of unlabeled estrone and [3,4C-<sup>13</sup>C]estrone (mixed in a 1:1 molar ratio). The bacterial culture was extracted using ethyl acetate, and the metabolites were analyzed through UPLC-APCI-HRMS.

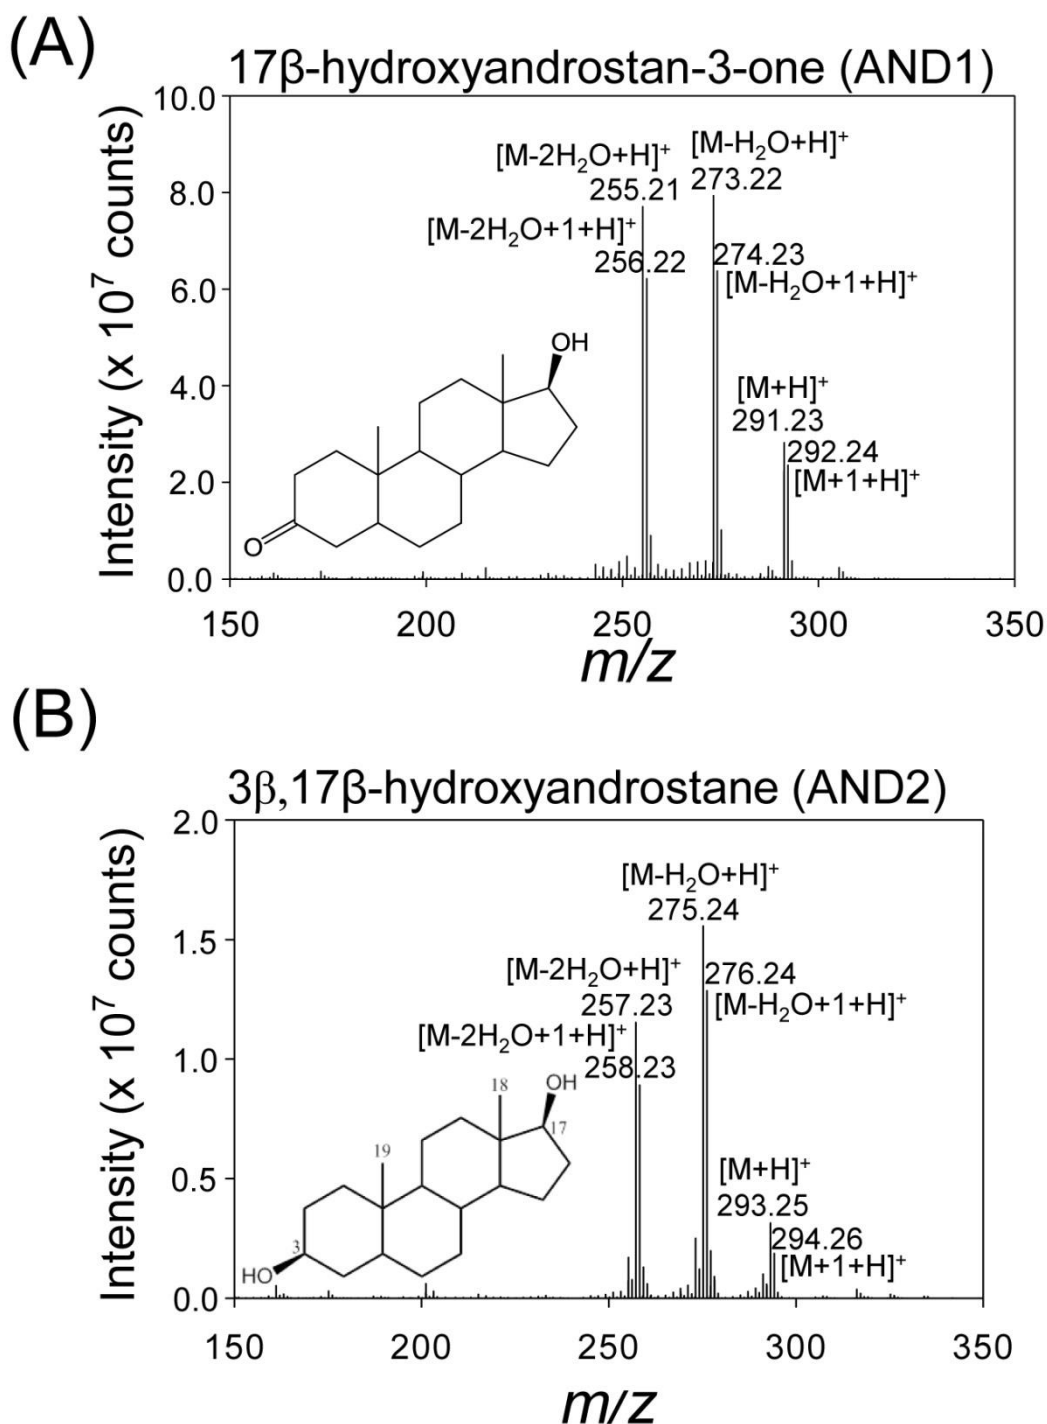

**Fig. S8.** UPLC–APCI–HRMS spectra of two TLC-purified androgen metabolites, 17 $\beta$ -hydroxyandrost-3-one (A) and 3 $\beta$ ,17 $\beta$ -dihydroxyandrostane (B). The androgens were produced by the strain DHT3 cell extract incubated with estradiol ([16,16,17-D3]17 $\beta$ -estradiol and unlabeled estradiol in a 1:1 molar ratio). See **Fig. 7B1** for the chemical composition of the reaction mixture. The predicted elemental composition of individual intermediates was calculated using Xcalibur™ Software (Thermo Fisher Scientific).

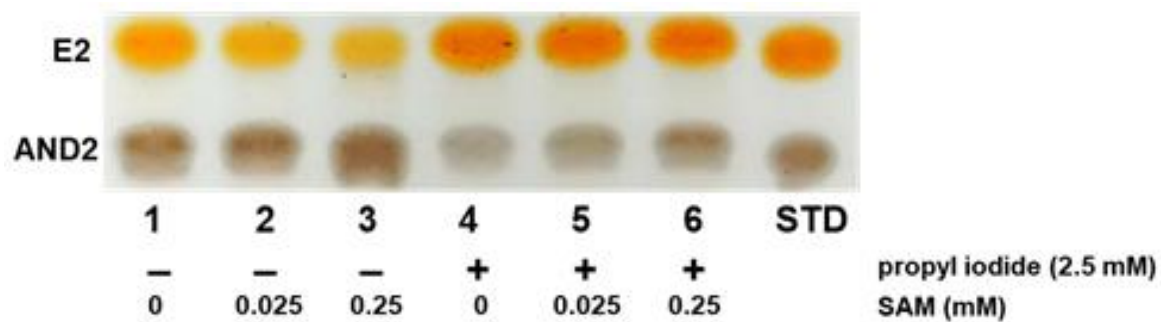

**Fig. S9.** SAM addition facilitates the estradiol methylation to form AND2 in the strain DHT3 cell-extracts. The androgen production exhibited a dose-dependent manner with SAM addition. The assay mixtures (1 mL) contained 100 mM HEPES-K<sup>+</sup> buffer (pH 8.0), strain DHT3 cell-extracts (5 mg), estradiol (0.25 mM), ATP (5 mM), MgSO<sub>4</sub> (10 mM), NADH (2 mM), SAM (0–0.25 mM), and with or without propyl iodide (2.5 mM). Abbreviations: E2, 17β-estradiol.



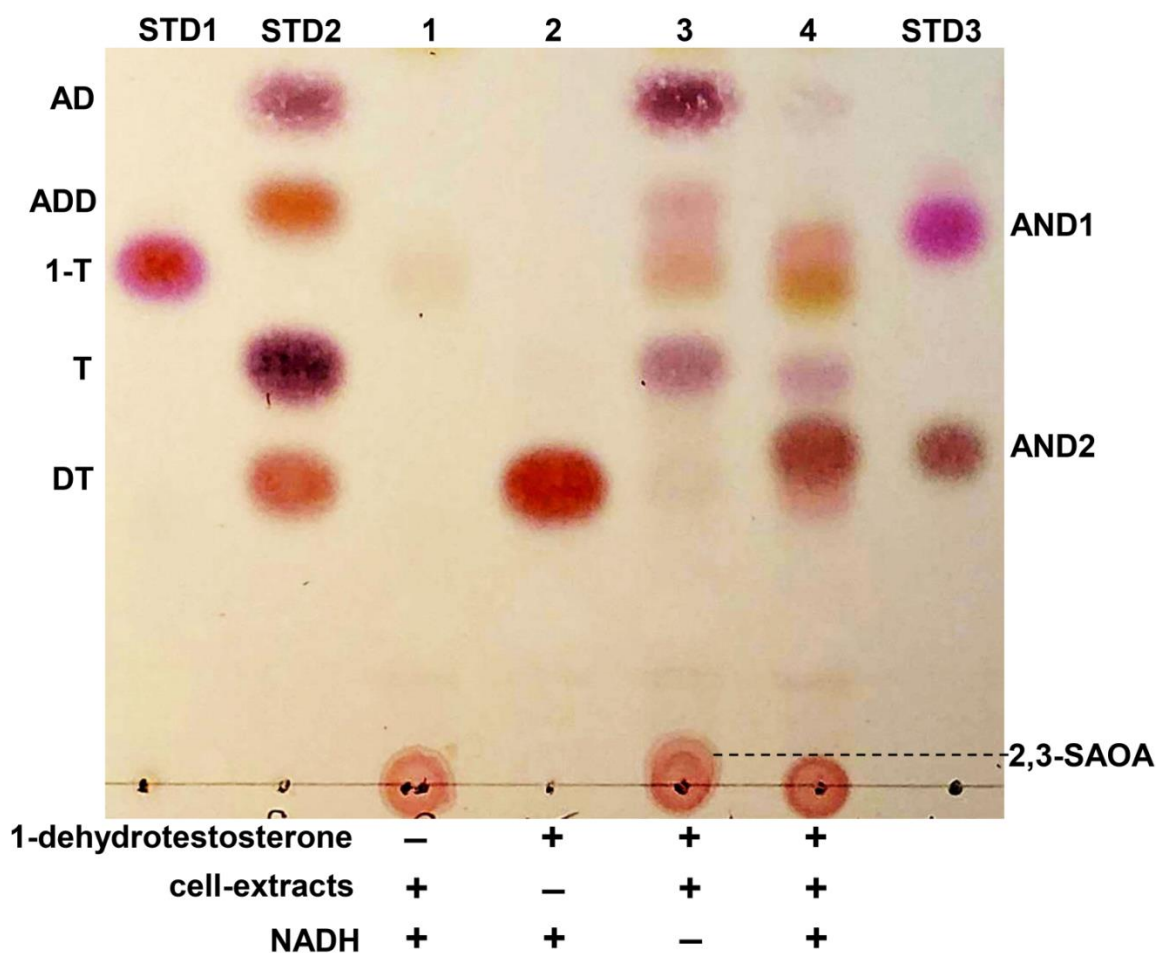

**Fig. S10.** TLC analysis indicated the addition of NADH (2 mM) to the strain DHT3 cell-extracts facilitates the transformation of 1-dehydrotestosterone (0.5 mM) into the reduced steroid metabolite AND2. The strain DHT3 cells were anaerobically grown with estradiol (2 mM). The identities of the AND2 and 2,3-SAOA on the TLC were validated through UPLC–HRMS. Abbreviations: AD, androst-4-en-3,17-dione; ADD, androsta-1,4-diene-3,17-dione; AND1, 17 $\beta$ -hydroxyandrost-3-one; AND2, 3 $\beta$ ,17 $\beta$ -dihydroxyandrostane; DT, 1-dehydrotestosterone; 2,3-SAOA, 17 $\beta$ -hydroxy-1-oxo-2,3-seco-androst-3-oic acid; STD, steroidal standards; T, testosterone; 1-T, 1-testosterone.

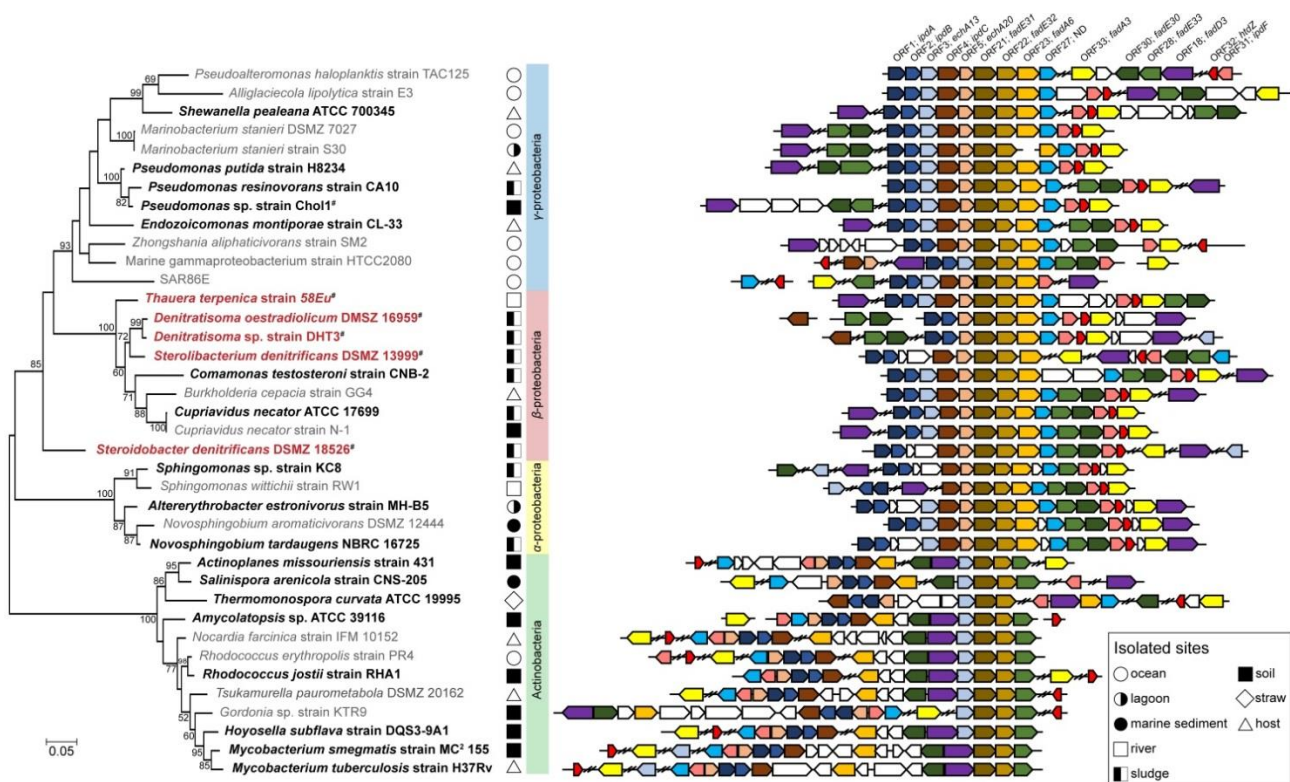

**Fig. S11.** Phylogenetic tree of the selected steroid-degrading bacteria and the distinguishable organization of HIP degradation genes in proteobacteria and actinobacteria (see **Dataset S2** for the detailed information of the selected bacterial strains). The phylogenetic trees were constructed using the neighbor-joining method with Jukes–Cantor parameter and a bootstrap value of 1000. Bacterial strains in bold: the steroid degradation capabilities have been experimentally verified. Bacterial strains in red: able to anaerobically degrade steroids.

## Supplemental Tables

**Table S1.** Morphological, physiological, and cytological properties of strain DHT3. +, apparent growth; -, no apparent growth was observed within 1 month.

| Characteristic                     | Phenotypes of strain DHT3                                                                                                                     |
|------------------------------------|-----------------------------------------------------------------------------------------------------------------------------------------------|
| Cell morphology                    | curved rod                                                                                                                                    |
| Motility                           | no                                                                                                                                            |
| Growth on agar                     | no                                                                                                                                            |
| DNA G+C content (mol%)             | 64.9                                                                                                                                          |
| Temperature range for growth (°C)  | 10~32                                                                                                                                         |
| Electron donors <sup>a</sup>       |                                                                                                                                               |
| Steroids                           | cholesterol (-), cholic acid (-), 17 $\alpha$ -ethynylestradiol (-), estradiol (+), estrone (+), testosterone (+),                            |
| Alcohols and ketones               | 2-propanol (-), butanol (-), cyclohexanol (-), cyclopentanone (-), glycerol (+),                                                              |
| Aromatics                          | benzoate (-), toluene (-), phenol (-)                                                                                                         |
| Organic acids                      | acetate (+), citrate (-), glutamate (-), formate (-), fumarate (+), hexanoate (+), laureate (-), oleate (-), pimelate (-)                     |
| Sugars                             | glucose (-), fructose (-), sucrose (-)                                                                                                        |
| Extracts                           | yeast extract (-), peptone (-)                                                                                                                |
| Electron acceptors <sup>b</sup>    | ferric ion (-), nitrate (+), oxygen (-), perchlorate (-), sulfate (-)                                                                         |
| Vitamins requirements <sup>c</sup> | <i>p</i> -aminobenzoic acid (-), biotin (-), calcium pantothenate (-), cyanocobalamin (+), nicotinic acid (-), pyridoxamine (-), thiamine (-) |

<sup>a</sup>Substrates tested with nitrate as the electron acceptor.

<sup>b</sup>Electron acceptors tested with estradiol as the electron donor.

<sup>c</sup>Vitamins tested with estradiol and nitrate as the electron donor and acceptor, respectively.

**Table S2.** Oligonucleotides used in this study.

| Primer               | Sequence                                                             | Usage                                                           |
|----------------------|----------------------------------------------------------------------|-----------------------------------------------------------------|
| 10305_emptD_1F       | AGACGTTCCTTGCCTAGTGC                                                 | Operon analysis: intergenic region B9N43_10305/ <i>emptD</i>    |
| 10305_emptD_1R       | GGAGGTTTTCCATCAGCCGA                                                 |                                                                 |
| emptD_emptC_2F       | GCCTATTTTCAGCAATGGCCG                                                | Operon analysis: intergenic region <i>emptD</i> / <i>emptC</i>  |
| emptD_emptC_2R       | ATCCTCTTCCCAGCTCTCGT                                                 |                                                                 |
| emptC_emptB_3F       | ACGAGAGCTGGGAAGAGGAT                                                 | Operon analysis: intergenic region <i>emptC</i> / <i>emptB</i>  |
| emptC_emptB_3R       | TTTGACTGCACCGATCACGA                                                 |                                                                 |
| emptB_emptA_4F       | AAAAAGCGGTCGAGCACAAAC                                                | Operon analysis: intergenic region <i>emptB</i> / <i>emptA</i>  |
| emptB_emptA_4R       | AGCAGGTCCACCGTAGTTTG                                                 |                                                                 |
| emptA_empt10330_5F   | AACCTGGGACTGCTATGCAC                                                 | Operon analysis: intergenic region <i>emptA</i> / B9N43_10330   |
| emptA_empt10330_5R   | GAACCCGGGGACTTGCATAA                                                 |                                                                 |
| 10330_10335_6F       | CGCCATTCAATACGGGCTTG                                                 | Operon analysis: intergenic region B9N43_10330/_10335           |
| 10330_10335_6R       | TGTCCACCAGTTCGTCAAG                                                  |                                                                 |
| emptA_F              | ATGATTCCAAGCATTGATTTCCAGC                                            | <i>emptA</i> -specific primers (expected product size = 1.4 kb) |
| emptA_R              | TTAGCGATAGGGCATGCC                                                   |                                                                 |
| emptA_773 774s IBS   | AAAAAAGCTTATAATTATCC<br>TTACTGGACGAGTTCGTGCG<br>CCCAGATAGGGTG        | TargetTron Gene Knockout system: <i>emptA</i> -specific primer  |
| emptA_773 774s EBS1d | CAGATTGTACAAATGTGGTG<br>ATAACAGATAAGTCGAGTTC<br>GATAACTTACCTTTCTTTGT | TargetTron Gene Knockout system: <i>emptA</i> -specific primer  |
| emptA_773 774s EBS2  | TGAACGCAAGTTTCTAATTTT<br>GGTTTCCAGTCGATAGAGGAA<br>AGTGTCT            | TargetTron Gene Knockout system: <i>emptA</i> -specific primer  |
| EBS Universal        | CGAAATTAGAACTTGCGTTCA<br>GTAAAC                                      | TargetTron Gene Knockout system: universal primer               |

**Table S3.** Selection of housekeeping genes of strain DHT3 used for constructing the linear regression line in the global gene expression profiles (RNA-Seq) in **Figure 3B**. Strain DHT3 cells were anaerobically grown with estradiol or testosterone.

| <b>Locus tag</b> | <b>Gene name</b> | <b>Definition</b>                                                       | <b>Testosterone<br/>[log<sub>2</sub>(X+1)]</b> | <b>Estradiol<br/>[log<sub>2</sub>(X+1)]</b> |
|------------------|------------------|-------------------------------------------------------------------------|------------------------------------------------|---------------------------------------------|
| B9N43_01505      | <i>aceE</i>      | pyruvate dehydrogenase (acetyl-transferring), homodimeric type          | 8.05                                           | 9.25                                        |
| B9N43_03845      | <i>gltA</i>      | citrate (Si)-synthase                                                   | 6.42                                           | 6.94                                        |
| B9N43_03880      | -                | malate dehydrogenase                                                    | 8.92                                           | 9.56                                        |
| B9N43_04270      | -                | pyruvate dehydrogenase (acetyl-transferring) E1 component subunit alpha | 2.16                                           | 4.21                                        |
| B9N43_07665      | -                | transcription termination factor Rho                                    | 8.27                                           | 10.62                                       |
| B9N43_08640      | -                | DNA gyrase subunit A                                                    | 8.96                                           | 9.81                                        |
| B9N43_09345      | <i>ftsZ</i>      | cell division protein FtsZ                                              | 8.82                                           | 10.57                                       |
| B9N43_09365      | -                | preprotein translocase subunit SecA                                     | 9.91                                           | 10.89                                       |
| B9N43_11395      | -                | RNA polymerase sigma factor RpoD                                        | 11.09                                          | 10.58                                       |
| B9N43_12040      | <i>recA</i>      | recombinase RecA                                                        | 10.95                                          | 10.57                                       |
| B9N43_12290      | <i>gyrB</i>      | DNA topoisomerase (ATP-hydrolyzing) subunit B                           | 6.69                                           | 8.43                                        |
| B9N43_12535      | <i>glnA</i>      | type I glutamate--ammonia ligase                                        | 7.27                                           | 9.35                                        |
| B9N43_15425      | <i>gap</i>       | type I glyceraldehyde-3-phosphate dehydrogenase                         | 9.22                                           | 10.05                                       |
| B9N43_15595      | -                | isocitrate dehydrogenase (NADP(+))                                      | 9.03                                           | 9.69                                        |
| B9N43_15770      | <i>tuf</i>       | elongation factor Tu                                                    | 10.43                                          | 10.26                                       |
| B9N43_15810      | <i>rpoB</i>      | DNA-directed RNA polymerase subunit beta                                | 5.95                                           | 7.80                                        |
| B9N43_15815      | <i>rpoC</i>      | DNA-directed RNA polymerase subunit beta'                               | 7.88                                           | 9.60                                        |
| B9N43_15830      | <i>fusA</i>      | elongation factor G                                                     | 6.11                                           | 7.30                                        |
| B9N43_16390      | <i>gap</i>       | type I glyceraldehyde-3-phosphate dehydrogenase                         | 4.33                                           | 3.91                                        |

**Table S4.** Selection of the cobalamin-dependent methyltransferases used for the un-rooted maximum likelihood tree construction. The functions of listed proteins were manually reviewed (Swiss-Port) or experimentally characterized except AMN47925.1.

| Enzyme                                                                                             | Subunit | Microorganism                                              | Taxonomy (Class)    | Accession No.          |
|----------------------------------------------------------------------------------------------------|---------|------------------------------------------------------------|---------------------|------------------------|
| <b>Estradiol methyltransferases from denitrifying proteobacteria</b>                               |         |                                                            |                     |                        |
| estradiol methyltransferase                                                                        |         | <i>Denitratisoma</i> sp. strain DHT3                       | Betaproteobacteria  | This study             |
| estradiol methyltransferase                                                                        |         | <i>Denitratisoma oestradiolicum</i> DSM 16959              | Betaproteobacteria  | This study             |
| estradiol methyltransferase                                                                        |         | <i>Steroidobacter denitrificans</i> DSM 18526              | Gammaproteobacteria | GeneBank<br>AMN47925.1 |
| <b>Methyltetrahydrofolate:homocysteine methyltransferases (methionine synthases) from bacteria</b> |         |                                                            |                     |                        |
| Methionine synthase (Group 2)                                                                      | Meth    | <i>Escherichia coli</i> K12                                | Gammaproteobacteria | UniPort P13009         |
| Methionine synthase (Group 1)                                                                      |         | <i>Mycobacterium tuberculosis</i> ATCC 25618               | Actinobacteria      | UniPort O33259         |
| Methionine synthase (Group 2)                                                                      |         | <i>Salmonella typhimurium</i> ATCC 700720                  | Gammaproteobacteria | UniPort P37586         |
| Methionine synthase (Group 2)                                                                      |         | <i>Vibrio cholerae</i> serotype O1 ATCC 39315              | Gammaproteobacteria | UniPort Q9KUU9         |
| Methionine synthase (Group 1)                                                                      |         | <i>Mycobacterium leprae</i> TN                             | Actinobacteria      | UniPort Q49775         |
| Methionine synthase (Group 2)                                                                      |         | <i>Pseudomonas aeruginosa</i> ATCC 15692                   | Gammaproteobacteria | UniPort Q9I2Q2         |
| Methionine synthase (Group 1)                                                                      |         | <i>Synechocystis</i> sp. PCC 6803                          | Cyanophyceae        | UniPort Q55786         |
| Methionine synthase (Group 2)                                                                      |         | <i>Aliivibrio fischeri</i> ATCC 700601                     | Gammaproteobacteria | UniPort Q5E814         |
| Methionine synthase (Group 2)                                                                      |         | <i>Vibrio parahaemolyticus</i> serotype O3:K6 RIMD 2210633 | Gammaproteobacteria | UniPort Q87L95         |
| Methionine synthase (Group 2)                                                                      |         | <i>Vibrio vulnificus</i> YJ016                             | Gammaproteobacteria | UniPort Q7MHB1         |
| Methionine synthase (Group 2)                                                                      |         | <i>Vibrio vulnificus</i> CMCP6                             | Gammaproteobacteria | UniPort Q7MHB1         |
| Methionine synthase (Group 2)                                                                      |         | <i>Aliivibrio fischeri</i>                                 | Gammaproteobacteria | UniPort Q9AJQ8         |
| <b>Coenzyme M (CoM) methyltransferases from methanogenic archaea</b>                               |         |                                                            |                     |                        |
| Monomethylamine:CoM methyltransferase                                                              | MtmB    | <i>Methanosarcina barkeri</i>                              | Methanomicobia      | UniPort O30642         |
|                                                                                                    |         | <i>Methanosarcina mazei</i> DSM 3647                       | Methanomicobia      | UniPort P58969         |
|                                                                                                    |         | <i>Methanosarcina barkeri</i> DSM 804                      | Methanomicobia      | UniPort P0C0W4         |
|                                                                                                    |         | <i>Methanosarcina barkeri</i>                              | Methanomicobia      | UniPort Q9P9L4         |
|                                                                                                    |         | <i>Methanosarcina acetivorans</i> ATCC 35395               | Methanomicobia      | UniPort P58865         |
|                                                                                                    |         | <i>Methanosarcina acetivorans</i> ATCC 35395               | Methanomicobia      | UniPort P58866         |
|                                                                                                    |         | <i>Methanosarcina barkeri</i> DSM 804                      | Methanomicobia      | UniPort Q46E72         |
|                                                                                                    |         | <i>Methanosarcina barkeri</i> DSM 804                      | Methanomicobia      | UniPort P0C0W3         |
| Dimethylamine:CoM methyltransferase                                                                | MtbB    | <i>Methanosarcina barkeri</i> DSM 804                      | Methanomicobia      | UniPort P0C0W5         |
|                                                                                                    |         | <i>Methanosarcina barkeri</i> DSM 804                      | Methanomicobia      | UniPort P0C0W6         |
|                                                                                                    |         | <i>Methanosarcina barkeri</i>                              | Methanomicobia      | UniPort O93661         |
|                                                                                                    |         | <i>Methanosarcina mazei</i> DSM 3647                       | Methanomicobia      | UniPort P58971         |
|                                                                                                    |         | <i>Methanosarcina mazei</i> DSM 3647                       | Methanomicobia      | UniPort P58970         |
|                                                                                                    |         | <i>Methanosarcina mazei</i> DSM 3647                       | Methanomicobia      | UniPort P58972         |
|                                                                                                    |         | <i>Methanosarcina barkeri</i>                              | Methanomicobia      | UniPort Q9P9N0         |
|                                                                                                    |         | <i>Methanosarcina acetivorans</i> ATCC 35395               | Methanomicobia      | UniPort Q8TS72         |
|                                                                                                    |         | <i>Methanosarcina acetivorans</i> ATCC 35395               | Methanomicobia      | UniPort Q8TN68         |
|                                                                                                    |         | <i>Methanosarcina acetivorans</i> ATCC 35395               | Methanomicobia      | UniPort Q8TTA5         |
|                                                                                                    |         | <i>Methanosarcina barkeri</i>                              | Methanomicobia      | UniPort Q9P9M9         |
| Trimethylamine:CoM methyltransferase                                                               | MttB    | <i>Methanosarcina barkeri</i>                              | Methanomicobia      | UniPort O93658         |
|                                                                                                    |         | <i>Methanosarcina acetivorans</i> ATCC 35395               | Methanomicobia      | UniPort Q8TTA9         |
|                                                                                                    |         | <i>Methanosarcina mazei</i> DSM 3647                       | Methanomicobia      | UniPort P58973         |
|                                                                                                    |         | <i>Methanosarcina mazei</i> DSM 3647                       | Methanomicobia      | UniPort P58974         |
|                                                                                                    |         | <i>Methanosarcina thermophila</i>                          | Methanomicobia      | UniPort Q9P995         |
|                                                                                                    |         | <i>Methanosarcina barkeri</i> DSM 804                      | Methanomicobia      | UniPort P0C0W7         |
|                                                                                                    |         | <i>Methanosarcina acetivorans</i> ATCC 35395               | Methanomicobia      | UniPort Q8TS73         |
|                                                                                                    |         | <i>Methanococcoides burtonii</i> DSM 6242                  | Methanomicobia      | UniPort Q12TR2         |
| Methanol:CoM methyltransferase                                                                     | MtaB    | <i>Methanosarcina barkeri</i> DSM 804                      | Methanomicobia      | UniPort Q46EH3         |
| Dimethylsulfide:CoM methyltransferase                                                              | MtsB    | <i>Methanosarcina barkeri</i>                              | Methanomicobia      | UniPort Q48925         |
|                                                                                                    |         | <i>Methanosarcina mazei</i> DSM 3647                       | Methanomicobia      | UniPort Q8PUA7         |
| <b>Tetrahydrofolate (THF) methyltransferases from acetogenic or methylotrophic bacteria</b>        |         |                                                            |                     |                        |
| Veratrol:THF <i>O</i> -demethylase                                                                 | OdmB    | <i>Acetobacterium dehalogenans</i>                         | Clostridia          | GeneBank<br>AAC83696.2 |
| Vanillate:THF <i>O</i> -methyltransferase                                                          | MtvB    | <i>Moorella thermoacetica</i> ATCC 39073                   | Clostridia          | GeneBank<br>YP429263.1 |
| glycine betaine:THF methyltransferase                                                              | MtgB    | <i>Desulfitobacterium hafniense</i> Y51                    | Clostridia          | UniPort Q24SP7         |
| Acetyl-CoA synthase/CO dehydrogenase                                                               | AcsE    | <i>Moorella thermoacetica</i>                              | Clostridia          | UniPort Q46389         |
| Chloromethane:THF methyltransferase                                                                | CmuA    | <i>Methylobacterium extorquens</i> CM4                     | Alphaproteobacteria | GeneBank<br>CAB39403.1 |

**Table S5.** UPLC–HRMS data of the intermediates involved in anaerobic estrone catabolism by strain DHT3. The steroid substrate was composed of unlabeled estrone and [3,4C-<sup>13</sup>C]estrone (mixed in a 1:1 molar ratio). The bacterial culture was extracted using ethyl acetate, and the metabolites were analyzed through UPLC–APCI–HRMS. MS data shown are from the unlabeled metabolites.

| Compound ID                    | UPLC behavior (RT <sup>a</sup> , min) | Molecular formula (predicted molecular mass) <sup>b</sup> | Dominant ion peaks | Identification of product ions                            |
|--------------------------------|---------------------------------------|-----------------------------------------------------------|--------------------|-----------------------------------------------------------|
| testosterone                   | 6.01                                  | C <sub>19</sub> H <sub>28</sub> O <sub>2</sub><br>288.21  | 289.21             | [M+H] <sup>+</sup>                                        |
| androst-4-en-3,17-dione        | 5.74                                  | C <sub>19</sub> H <sub>26</sub> O <sub>2</sub><br>286.19  | 287.19             | [M+H] <sup>+</sup>                                        |
| DT                             | 5.57                                  | C <sub>19</sub> H <sub>26</sub> O <sub>2</sub><br>286.19  | 287.20             | [M+H] <sup>+</sup>                                        |
| androsta-1,4-diene-3,17-dione  | 5.30                                  | C <sub>19</sub> H <sub>24</sub> O <sub>2</sub><br>284.18  | 285.18             | [M+H] <sup>+</sup>                                        |
| 1-testosterone                 | 6.32                                  | C <sub>19</sub> H <sub>28</sub> O <sub>2</sub><br>288.21  | 289.21             | [M+H] <sup>+</sup>                                        |
| 17-hydroxy-androstan-1,3-dione | 5.15                                  | C <sub>19</sub> H <sub>28</sub> O <sub>3</sub><br>304.21  | 287.20<br>305.21   | [M-H <sub>2</sub> O+H] <sup>+</sup><br>[M+H] <sup>+</sup> |
| 2,3-SAOA                       | 5.08                                  | C <sub>19</sub> H <sub>30</sub> O <sub>4</sub><br>322.22  | 305.21<br>323.22   | [M-H <sub>2</sub> O+H] <sup>+</sup><br>[M+H] <sup>+</sup> |
| HIP                            | 2.39                                  | C <sub>13</sub> H <sub>18</sub> O <sub>4</sub><br>238.12  | 221.12<br>239.13   | [M-H <sub>2</sub> O+H] <sup>+</sup><br>[M+H] <sup>+</sup> |

<sup>a</sup>RT, retention time.

<sup>b</sup>The predicted molecular mass was calculated using the atom mass of <sup>12</sup>C (12.0000), <sup>16</sup>O (15.9949), and <sup>1</sup>H (1.0078).

**Table S6.**  $^1\text{H}$ - (600 MHz) and  $^{13}\text{C}$ -NMR (150 MHz) spectral data of the HPLC-purified androgen metabolite (AND2) and the authentic standard  $5\alpha$ -androstan- $3\beta,17\beta$ -diol (=3 $\beta,17\beta$ -dihydroxyandrostane) purchased from Steraloids, Inc.

| Positions | AND2                     |                 | $5\alpha$ -androstan- $3\beta,17\beta$ -diol |                 |
|-----------|--------------------------|-----------------|----------------------------------------------|-----------------|
|           | $^1\text{H}^{a,b}$       | $^{13}\text{C}$ | $^1\text{H}^{a,b}$                           | $^{13}\text{C}$ |
| 3         | 3.51 (1H, m)             | 72.0            | 3.50 (1H, m)                                 | 72.0            |
| 17        | 3.55 (1H, t, $J = 8.7$ ) | 82.7            | 3.55 (1H, t, $J = 8.7$ )                     | 82.7            |
| 18        | 0.85 (3H, s)             | 11.8            | 0.85 (3H, s)                                 | 11.8            |
| 19        | 0.72 (3H, s)             | 12.9            | 0.72 (3H, s)                                 | 12.9            |

<sup>a</sup> Measured in methanol- $d_4$ .

<sup>b</sup>  $\delta$  in ppm, mult. ( $J$  in Hz).



## **Legends for Datasets**

**Dataset S1 (separate file).** Genome annotation of strain DHT3 and transcriptomic analysis (RNA-Seq) of bacterial cells grown anaerobically with testosterone or estradiol.

**Dataset S2 (separate file).** Selection of the bacteria used for comparative analysis of the gene organization for HIP degradation in **Fig. S11**.

## Supplemental Appendix

**Appendix S1.** Nucleotide sequence of the 16S rRNA gene (B9N43\_08010) of strain DHT3.

AGAGATTGAACTGAAGAGTTTGATCCTGGCTCAGATTGAACGCTGGCGGAATG  
CTTTACACATGCAAGTCGAACGGCAGCACGGGTGCTTGCACCTGGTGGCGAG  
TGCGAACGGGTGAGTAATACATCGGAACGTGCCAGTAGAGGGGGATAACC  
GTCCGAAAGGATGGCTAATACCGCATAACGCCCTGAGGGGGAAAGCGGGGGAC  
CGCAAGGCCTCGCGTTATTGGAGCGGCCGATGTCGGATTAGCTAGTTGGTGGG  
GTAAAGGCCTACCAAGGCGACGATCCGTAGCTGGTCTGAGAGGATGATCAGCC  
ACACTGGGACTGAGACACGGCCAGACTCCTACGGGAGGCAGCAGTGGGGA  
ATTTTGGACAATGGGGGCAACCCTGATCCAGCCATTCCGCGTGAGTGAAGAAG  
GCCTTCGGGTTGTAAAGCTCTTTCGGCAGGAACGAAAAGGTGGTCACTAATAC  
TGGCTACTGATGACGGTACCTGAAGAAGAAGCACCGGCTAACTACGTGCCAG  
CAGCCGCGTAATACGTAGGGTGCAGCGTTAATCGGAATTACTGGGCGTAAA  
GCGTGCGCAGGCGGTTTTGTAAAGACAGCTGTGAAATCCCCGGGCTTAACCTGG  
GAACTGCGGTTGTGACTGCAAGACTGGAGTGTGGCAGAGGGGGGTGGAATTC  
CACGTGTAGCAGTGAAATGCGTAGAGATGTGGAGGAACACCGATGGCGAAGG  
CAGCCCCCTGGGTAAACTGACGCTCATGCACGAAAGCGTGGGGAGCAAAC  
AGGATTAGATACCCTGGTAGTCCACGCCCTAAACGATGCCAACTAGGTGTTGG  
GGAAGGAGACTTCCTTAGTACCGTAGCTAACGCGTGAAGTTGGCCGCCTGGG  
GAGTACGGTCGCAAGATTAAACTCAAAGGAATTGACGGGGACCCGCACAAG  
CGGTGGATGATGTGGATTAATTCGATGCAACGCGAAAAACCTTACCTACCCTTG  
ACATGCCAGGAACTTTCCAGAGATGGATTGGTGCCCGAAAGGGAGCCTGGAC  
ACAGGTGCTGCATGGCTGTCGTCAGCTCGTGTCGTGAGATGTTGGGTAAAGTC  
CCGCAACGAGCGCAACCCTTGTCATTAGTTGCCATCATTAGTTGGGCACTCTA  
ATGAGACTGCCGGTGACAAACCGGAGGAAGGTGGGGATGACGTCAAGTCCTC  
ATGGCCCTTATGGGTAGGGCTTCACACGTCATACAATGGTCGGTACAGAGGGT  
TGCCAAGCCGCGAGGTGGAGCCAATCCAGAAAGCCGATCGTAGTCCGGATT  
GGAGTCTGCAACTCGACTCCATGAAGTCGGAATCGCTAGTAATCGCGGATCAG  
CATGTCGCGGTGAATACGTTCCCGGGTCTTGTACACACCGCCCGTCACACCAT  
GGGAGTGGGTTTACCAGAAGTAGGTAGTCTAACCGCAAGGAGGGCGCTTAC  
CACGGTGGGGTTCATGACTGGGGTGAAGTCGTAACAAGGTAGCCGTATCGGA  
AGGTGCGGCTGGATCACCTCCTTTCTA

**Appendix S2.** Nucleotide sequence of the *emtA* gene (B9N43\_10325) of strain DHT3.

ATGATTCCAAGCATTGATTTCCAGCGGCGCTCAACCACCGGACCTGTTGGCAA  
GACCGACGACTTTGACCTGGATCTGGCCTTCAAGGTCAGGGAACTGGTGGAG  
ACCTACAACATCAAGTACGACCCCAACCAACTTGTGGTGGATGACCGCACGG  
CAGATGCAATTTTTGATGCGGGCGTCGAATTGCTGGCCGAGGTCCGGCCTGTTT  
CATCAGCAGACCTCGCGCATCATGCTGTACTCCAAGGAGGAACTCTATCAACT  
GGCGGCCGAGTCCAAGGCGAACCAGCCTGCATTCCCTTTGGAAAAGGCGAG  
GACCGGATGTATCTGCGGCATCGCAAGAGTACAGACACCTTTGCCCCGACAAA  
CTACGGTGGACCTGCTGGAGTCGCTGAACCGGAGTGGTTCATTCCCTATGTTT  
AGTCCTTTGCCAGGAGCGTCATGTAAAGGGCCTGGGGATTTGTCCGGGCGTA  
CCGCGCATTGGCGATCTTGACCCGAAGGCCGGTACCCTGACCGAAGTGGAAT  
CGCCCTTTGGGAGCAGGAAGCCCTGCGTGAGGCGCTGAAGCGCACTGGCCGT  
CTGAACATGAACCTGGGACTGCTATGCACCGCCAGCACCCCTCGGGCACCAT  
GTCGGTCATGGCCAGTGGGTATCGGGACCATCTGAATAACCAGATCGGCATTC  
ACATCATGCCCGAACAGAAAATGAGCTGGAATCCGCTGCTGCTTTCCCAGTAC  
TGCGAGAACGCCGGGATCGAGCCCTGGATGAGTTCGATGTCCTGCATCGGCGG  
TTTGTGTCGGGATGCCGCCGAGGTCGCAGTAACAATGGTGGCTAACGCGTTGG  
GGCAACTCAGCTATGCCAAGGGCGGCTCCATGAGCTACTTCCCCAGCCATCTG  
GATGGGACATGGGCAACGCGACCTTCTCATTGGGCATTCAGTGGCGCAGCCCG  
TGCTTCTGAACGTCACCTTGGACTIONGGCTGTGGGAACCTCTATCTCGGGCATCA  
CCAATGCCTGGCGCACTCCCTTGACCCTGTGGCAGTCGGCGGGCGGTTCGTGTTG  
ACCTCCGTGGCCAGCGGATTGTCCTATGCCTGGATTTCGGACATAACCGGCCTG  
GAGGCGCGACTGATCGGAGAAATGATGGATGTTTGCCTGGCATGCCGGCAA  
AGGAAGCCAATGAACTGGCCAGCGGGTTATGGTCAAGGTTGATGAGCTTCTG  
CCTCAGGTAACGAAGCAGTTGCCCTTCGTCGAAGCTTATGACATCGAAACCGT  
TCAGCCCCGTCCGGCATAACGAGTCTTCCATGCTGAAGGTGCGGGATGAACTGC  
AGCGTATGGGCATGCCCTATCGCTAA

**Appendix S3.** Nucleotide sequence of the *emtB* gene (B9N43\_10320) of strain DHT3.

ATGAGCAGCATTGAGGCAATCCGTGAGGCCGTCTGGCGCCTGAAGAAAAAGG  
ATGCCGTTGCCCTGGTGGAAAGAAGGCCTTGCAGAAGGGCTTGATCCTACTGCG  
ATGTTGAAGGAAGGGGTCATTGCCGGTTTGCAGGAGGTTCGGGCGCAAGTTTG  
GTGCCGGCGAGTATTTTCTGGCAGAACTGGTGATGGCTGGCAAGGTCGGTGA  
GCCCTGTATCGACTTGATCACGCCTCACTTACCGCCGAATTCGGAAGGGAAGA  
TGGGAACGGTCGTGATCGGTGCAGTCAAAGGCGATCTGCACACCATTGGCTAC  
GGGCTGGTGACAACCCAACCTGGAGTTGGCGGGATTTCGAAGTCATCAAGCTGG  
GCATCGACCTGGACAGCAAGTACTTCATCGAAAAAGCGGTCGAGCACAACGC  
CGACATCATCGGCCTGTCCGCCTTCCTGGTGACGACCATTCCCTATTGCCCAGA  
AGTCTTGGGTTATTTGAAGGACATGGGGCTGCGGGATCGCTTCAAGGTCATCA  
TCGGCGGCACGGAATGTACCGCCGACAAGGCGGACGCCATGGATGCCGATGG  
CTGGGCACTCAATGCAATCTCAGCGGTGCCACTGTGCAAGCGCCTGATGGGCA  
AGGACGTGGGTGAGGAGGCCAAGCTCGCGCAAACCTACGACCACGGCTGGT  
GGTACAACCTCCCGCCGCCATGGCACCTGA

**Appendix S4.** Nucleotide sequence of the *emtC* gene (B9N43\_10315) of strain DHT3.

ATGAAGCTCGAAGAATTA AAAACGCAGTTC CCGGATCTGACATTTGAGGAGGT  
CGGTCCTGACGAGAGCTGGGAAGAGGATGGCGCCGGATATTGCTTCGTTATAG  
AGGCGATGATCAAGGACAAGCGTGTTTCGCGCTACCGTCATGGTGGATGACTTG  
CCGCGGGTGGCCTTCACGGGTGACTCTGTGGGCATCCGCAAGATGCTGGTGA  
GGTGGGCAGTGGGGCGGGATCACTTGGCATATCTGGCCTATGAGCTGGGCCGG  
GCCGAGATGGCGATCCGTCACGGCGTCCCCTTCCTTCAGGAGTGA

**Appendix S5.** Nucleotide sequence of the *emtD* gene (B9N43\_10310) of strain DHT3.

ATGTTTCATGCAGTTCTGGCAATCACTGTTTCTGACGGAAGGGGACCAGATACT  
TGATGTGACCAAGATATGCGATGGTCTTGGTTTCCACGGGATGCTGTTTCCCGA  
TCATCTGATCCACCCCGAGAAGCAGGACTCCACCTACCTGTACTCGGCTGATG  
GAAAACCTCCATCATTTACGGAGGACACAGTATGGCCTGAGTGTTGGTCGCTA  
TTTGCGACGTTGGCGGCTATGACCAAGAATCTGCATTTCTGCACATGCGTTTTC  
ATTCTTCCCTTACGCAATCCGATTGAACTGGCCAAGGCAACGTCAAGCGTTGC  
CTATTTACGCAATGGCCGTATCCATCTGGGCGCCGGGGCCGGCTGGATGAAGG  
AAGAGTTCGAGATGCTCGGCGTGGATTGGGCCACGCGCGGAAAGCGATATGA  
CGAGTGTATCGAGGTGATGCGCAAGCTCTATACGGGGCAGTACGTCGAACACC  
ACGGCGAATTCTTCGATTTCCACGCATCATGATGACGCCGGTTCCAGAGAAA  
CCCGTGCCCATCCTGATCGGCGGCATCAGCGGCCCCCGCCTTGCGTCGAGCTGC  
CCGTATTGGCGATGGTTGGATCGGGCCGGGACAGAGTGTCGATGCGGCCCTGC  
AAACCCTGAGTACCCTGAATAAGTTGCGGACCGAGTACGGAACGCAGAACAA  
GGAATTCAACAACATCGTTCCTATCTACGGGGATGTCAGCATCGACGACATCA  
AGCGACTGGAGGACGCTGGGGCTACAGGGATGGTCAGCTTGCCCTTTGCTTTC  
ACAATCAAACCAGGAACGACCTTGGAGGAAAAGCGTGCCTATCTGGAGCGCT  
ATTCCCAGGAAGTCATTGCGAAATTCAGGTGA

## SI References

1. C.J. Shih *et al.*, Biochemical mechanisms and microorganisms involved in anaerobic testosterone metabolism in estuarine sediments. *Front. Microbiol.* **8**, 1520 (2017).
2. D. J. Lane, “16S/23S rRNA sequencing” in *Nucleic Acid Techniques in Bacterial Systematics*, E. Stackebrandt, M. Goodfellow, Eds. (John Wiley and Sons, 1991), pp. 115–175.
3. N. Pfenning, *Rhodocyclus purpureus* gen. nov. and sp. nov., a ring-shaped, vitamin B12-requiring member of the family Rhodospirillaceae. *Int. J. Syst. Bacteriol.* **28**, 283–288 (1978).
4. R. G. Matthews, M. Koutmos, S. Datta, Cobalamin-dependent and cobamide-dependent methyltransferases. *Curr. Opin. Struct. Biol.* **18**, 658-666 (2008).
5. R. C. Edgar, MUSCLE: multiple sequence alignment with high accuracy and high throughput. *Nucleic Acids Res.* **32**, 1792–1797 (2004).
6. S. Kumar, G. Stecher, M. Li, C. Knyaz, K. Tamura, MEGA X: molecular evolutionary genetics analysis across computing platforms. *Mol. Biol. Evol.* **35**, 1547–1549 (2018).
